# Supplementary material for: The NAC-type transcription factor OsNAC2 regulates ABA-dependent genes and abiotic stress tolerance in rice
Source: PubMed Central journal article supplement (PMC5225416; doi:10.1038/srep40641), 2017-01-11
Supplement: srep40641-s1.pdf [file srep40641-s1.pdf]

# The NAC-type transcription factor *OsNAC2* regulates ABA-dependent genes and abiotic stress tolerance in rice

Jiabin Shen<sup>#1</sup>, Bo Lv<sup>#1</sup>, Liqiong Luo<sup>#1</sup>, Jianmei He<sup>2</sup>, Chanjuan Mao<sup>1</sup>, Dandan Xi<sup>1</sup>, and Feng Ming<sup>1,\*</sup>

1 State Key Laboratory of Genetic Engineering, Institute of Genetics, Institute of Plant Biology, School of Life Science, Fudan University, Shanghai 200433, China

2 Rice Research Institute, Sichuan Agricultural University, Sichuan 611130, China

<sup>#</sup>These authors contributed equally to this work.

\* Corresponding authors: F Ming, Tel: 86-21-51630555; Email: [fming@fudan.edu.cn](mailto:fming@fudan.edu.cn)

**Supplemental data**

Table S1: Primers used for realtime-PCR.

| Gene names      | Primer                                             |
|-----------------|----------------------------------------------------|
| <i>OsNAC2</i>   | F: gagaagtctggctgggtcat<br>R: aacaccactcgtgtttgga  |
| <i>OsACTIN</i>  | F: ctgcgataatggaactgt<br>R: acaatcctggggaagaca     |
| <i>OsLEA3</i>   | F: ggcgcagtacaccaagga<br>R: acctgctcactgcctgt      |
| <i>OsRAB21</i>  | F: gagggaggagcacaagacc<br>R: attccatcatcctcagacgag |
| <i>OsRAB16C</i> | F: cagttccagccggtgaag<br>R: catcccgtcgtcctcaga     |
| <i>OsRAB16D</i> | F: cgtctctccctgctttctga<br>R: ttctcaacgggacgacaa   |
| <i>OsSAPK1</i>  | F: gccacagcgtatgatgcgta<br>R: taatctctggccgctcgtg  |
| <i>OsSAPK10</i> | F: tcttgacgtggaagcagtg<br>R: tccactcccagtttcttg    |
| <i>OsZIP46</i>  | F: atcaagaacaggagtccegc<br>R: gagccatcaccattaccaa  |
| <i>OsZIP72</i>  | F: aatgaggtagaagaaatgat<br>R: gcacagtcgctgatgaagg  |
| <i>OsASR5</i>   | F: aagcaagcaaagccacatct<br>R: cgtccttctgtgtggaac   |
| <i>OsDEG10</i>  | F: agcggatcgacaagtattg<br>R: aacacaaccagcacctcatg  |
| <i>OsSAP1</i>   | F: acctgaggtccccttccat<br>R: tgccttaggtggtcagaacc  |
| <i>OsHKT1;5</i> | F: acctgaggtccccttccat<br>R: tgccttaggtggtcagaacc  |

Table S2: Primers used for yeast one-hybrid and ChIP-qPCR.

| Gene names                         | Primer                                 |
|------------------------------------|----------------------------------------|
| <i>OsNAC2</i> pro-F                | 5'- cggaattcgtaccctgattctaatacaggt -3' |
| <i>OsNAC2</i> pro-R                | 5'- cgggatccaagtgggaggggtggtggtgcc -3' |
| <i>OsNAC2</i> -F- <i>EcoR</i> I    | 5'- cagaattcatggagcagcatcagggc -3'     |
| <i>OsNAC2</i> -R- <i>Xho</i> I     | 5'- aaactcagtttagtagcccatagcgcg -3'    |
| <i>OsLEA3</i> -F- <i>EcoR</i> I    | 5'- ggaattcctcatcctttgttgatctgtgg -3'  |
| <i>OsLEA3</i> -R- <i>Sma</i> I     | 5'- tccccgggtgatcctaagctcaaaaatta -3'  |
| <i>OsSAPK1</i> -F- <i>EcoR</i> I   | 5'- ggaattcacatccgatagttaaaactttg -3'  |
| <i>OsSAPK1</i> -R- <i>Mlu</i> I    | 5'- cgacgcgtatcccctcaacgacctgctcc -3'  |
| <i>OsABA8OX3</i> -F- <i>EcoR</i> I | 5'- ggaattctagcaaatcaacagggtatagt -3'  |
| <i>OsABA8OX3</i> -R- <i>Mlu</i> I  | 5'- cgacgcgtccaatgacctggagaattaa -3'   |
| <i>OsRab16A</i> -F- <i>EcoR</i> I  | 5'- ggaattctctcaaccttttaactaagta -3'   |
| <i>OsRab16A</i> -R- <i>Mlu</i> I   | 5'- cgacgcgtgtggacctggatgtgcaaaact -3' |
| <i>OsLEA3</i> pro-F1-F             | 5'- atccatgaggtagcatgcaagc -3'         |
| <i>OsLEA3</i> pro-F1-R             | 5'- acgacgacgtatcgaacggccag -3'        |
| <i>OsLEA3</i> pro-F2-F             | 5'- agctgccgtatctagcttcagg -3'         |
| <i>OsLEA3</i> pro-F2-R             | 5'- gtggcgtggcatgctagaaaag -3'         |
| <i>OsLEA3</i> pro-F3-F             | 5'- cgttcttcttggctggtttac -3'          |
| <i>OsLEA3</i> pro-F3-R             | 5'- aatgcacggacctctgttcttc -3'         |
| <i>OsLEA3</i> pro-F4-F             | 5'- ccggagagagccgaagccgacg -3'         |
| <i>OsLEA3</i> pro-F4-R             | 5'- gacaagagaagatgttcattta -3'         |
| <i>OsSAPK1</i> pro-F1-F            | 5'- gtattaacataggctaaaaaa -3'          |
| <i>OsSAPK1</i> pro-F1-R            | 5'- tagtaacacactgtcaaatcat -3'         |
| <i>OsSAPK1</i> pro-F2-F            | 5'- cggatctaaacaccccataagg -3'         |
| <i>OsSAPK1</i> pro-F2-R            | 5'- gttaggtttgaggaggattgag -3'         |
| <i>OsSAPK1</i> pro-F3-F            | 5'- gcctaagggtctgttagatcc -3'          |
| <i>OsSAPK1</i> pro-F3-R            | 5'- acacgcaatctgtataattag -3'          |

**Figure S1: Promoter sequence of OsNAC2 (Primer regions are underlined).**

gtaccctgattctaatacagggttcagggcaaatgattatacgtactactgtacaatccctgcagaaaattacgcacaaag  
accaaatacaagggttgctatggactgaatatacttttggttgcgcctggacgtcggtagctacccagatattaattaa  
ttatttgaattagtgattttgtaccaaatacgaaccagctcatgcttagcatgaagctaataaattctcccgtttattgca  
gtactcgaatacaaatagtaggtgtactactcgccatggagctgctctaattcgttctcaaaagcttctggagacgaagg  
attgggttggtcgctttctcggttgctgctcggctcgcgtgctgcatatgacgctttacttaatgctgctagtagtactataa  
ttccattaattaagactcatttaattagtaatgcaccaaataccttaaatccagccagatcagatcaaagtcatcctagggt  
aaaacactctgatctgatggatcactagccactaaattaatccggtgattgatcatgtgtggaagcaagtttggctcgtt  
acaaggactattacataacactacgctgctctgtatagctatctcatctatctcttccatgcattttcacctactagcta  
gtactccatccgttttaaatgtttgacaccgttgacttttagcacatgtttgaccgttcttattcaaaaattttgtga  
aatatgtaaaactatatgtgtacatgaaagtataatcaataaatcgaatgatgaaaagaataaataactacttaa  
atTTTTgaataagacgaatggTTaaacacgtactaaaaagTcaacggTgtcaaacattttgaaatggaggaggtagtaa  
cctgtgatgagtttcttcatcaccacgtctcttctactaaaaagacatcatgtagctcgcctctagtatttaaggggca  
ccaccaccctcccactttatttctctatacaacgatttctctgtcacccTgaatctacttctgctgcaaaaggtaattagcatatcctaa  
ctatttatcacctcatccctcaagtgtgttcttactttcttagatgtacttttaaacTTTTctgtgcataaacatctcatgtgctgattcttttg  
tgttctatgtgcttgcataccatgtccgttggTtcgattcttttaagcatccgtgtggttgttttTttagcttagctagctagctagcaa  
agaggTgcatggatacataaccagctttaattgattggTttgctctaccttaaaagTgtgtgaatcatctccgtcctagtTtatgcatatctg  
tgtgcatatgtacaaatgtttcaggacaggagttggcataacagctaacaatacttatatagcagcaataagcaaggagcagttagcc  
aggtaaagctctagctagctagcttaggcagca



+ TATATTTAAC AATAAATCGA ATGATATGAA AAGAATAAAAT AACTACTTAA ATTTTTTGAAT AAGACGAAT  
- ATATAAATGG TTATTTAGCT TACTATACCTT TTCTTATTTA TTGATGAATT TAAAAAACTTA TTCTGCTTA  
**GT1-motif G-Box** **HSE**

+ GGTTAAACAC GTACTAAAAA GTCAACGGTG TCAAACATTT TGAAATGGAG GGAGTAGTAAC CTGTGATGA  
- CCAATTTGTG CATGATTTTT CAGTTGCCAC AGTTTGTAAA ACTTTACCTC CCTCATCATTG GACACTACT  
**ABRE** **G-box** **ERE**

+ GTTTCCTTCA TCACCCAGT CTCTTTCTAC TAAAAAGACC ATCATGTAGC TCGCCTCTAGT ATTTAAGGG  
- CAAAGGAAGT AGTGGGTGCA GAGAAAGATG ATTTTTCTGG TAGTACATCG AGCGGAGATCA TAAATTCCC

+ GCACCACCAC CCCTCCCACT TTATTTCTC TATACAACGA TTTCTCTTG TCACCCTGAAT CTACTTCTG  
- CGTGGTGGTG GGGAGGGTGA AATAAAGGAG ATATGTTGCT AAAGGAGAAC AGTGGGACTTA GATGAAGAC

+ CTGCAAAAGG TAATTAGCAT ATCCTAACTA TTTATCACCT CATCCCTCAA GTGTGTTCTTC TACTTTCTT  
- GACGTTTTCC ATTAATCGTA TAGGATTGAT AAATAGTGA GTAGGGAGTT CACACAAGAAG ATGAAAGAA  
**P-box**

+ AGATGTACTT TTTAACTTT TCTGTGCATA AACATCTCAT GTGCTGATT CTTTTGTGTGT TCTATGTGC  
- TCTACATGAA AAATTTGAAA AGACACGTAT TTGTAGAGTA CACGACTAAG AAAAACACACA AGATACAG

+ TTGCATACCA TGTCGGTTG GTTCGATTG ATTTTTTAAG CATCCGTGTG GTTTGTTTTTG TTCTAGCTT  
- AACGTATGGT ACAGGCAAAC CAAGCTAAGC TAAAAAATTC GTAGGCACAC CAAACAAAAAC AAGATCGAA

+ AGCTAGCTAG CTAGCAAAGA GGTGTCATGG ATACATACCA GCTTTAATTT GATTTGGTTTG CTCTACCTT  
- TCGATCGATC GATCGTTTCT CCACAGTACC TATGTATGGT CGAAATTAAA CTAAACCAAAC GAGATGGAA  
**GT1-motif**

+ TAAAAGTGTG TGAATCATCT CCGGTCCTAG TTTATGCATA TCTGTGTGCA TATGTACAAAT GTTTCAGGA  
- ATTTTCACAC ACTTAGTAGA GGCCAGGATC AAATACGTAT AGACACAGT ATACATGTTTA CAAAGTCCT

+ CAGGAGTTGG CATAACAGCT AACAAATCTT ACATATATAG CAGCAATAAG CAAGGAGCAGT TAGCCAGGT  
- GTCCTCAACC GTATTGTCGA TTGTTTAGAA TGTATATATC GTCGTTATTC GTTCTCTGTCA ATCGGTCCA  
**MBS**

+ AAAGCTCTAG CTAGCTAGCT TAGGCAGCA  
- TTTCGAGATC GATCGATCGA ATCCGTCGT

**Motifs function:**

**ABRE:** cis-acting element involved in the abscisic acid responsiveness

**GT1-motif:** light responsive element

**HSE:** cis-acting element involved in heat stress responsiveness

**W box**

**CGTCA-motif:** cis-acting regulatory element involved in the MeJA-responsiveness

**ERE:** ethylene-responsive element

**G-Box:** cis-acting regulatory element involved in light responsiveness

**MBS:** MYB binding site involved in drought-inducibility

**P-box:** Gibberellin-responsive element

**TC-rich repeats:** cis-acting element involved in defense and stress responsiveness

TCA-element: cis-acting element involved in salicylic acid responsiveness

TGACG-motif: cis-acting regulatory element involved in the MeJA-responsiveness

Circadian: cis-acting regulatory element involved in circadian control
